# Supplementary material for: Self-healing, recyclable, and removable UV-curable coatings derived from tung oil and malic acid
Source: Royal Society of Chemistry journal article supplement (doi:10.1039/d1gc01726h), 2021-01-01
Supplement: d1gc01726h1.pdf [file d1gc01726h1.pdf]

## Supporting Information

### Self-healing, recyclable, and removable UV-curable coatings derived from tung oil and malic acid

Jinshuai Zhang <sup>a</sup>, Jia Huang <sup>a</sup>, Guoqiang Zhu <sup>a</sup>, Xixi Yu <sup>a, b</sup>, Jianwen Cheng <sup>a, b</sup>, Zengshe Liu <sup>c, §</sup>, Yun Hu <sup>a</sup>, Qianqian Shang <sup>a</sup>, Chengguo Liu <sup>a, \*</sup>, Lihong Hu <sup>a</sup>, Yonghong Zhou <sup>a</sup>

#### S1. Determining the cycle recovery ratio for TMG-M1

The cycle recovery ratio ( $R_r$ ) was determined by the following equation:

$$R_r = \frac{(L_p - L_e)}{(L_p - L_s)} \quad (\text{S1})$$

Where  $L_p$ ,  $L_s$ , and  $L_e$  are the predetermined strain (5%), the initial strain, and the end strain of each cycle, respectively.

#### S2. Determining the grafted degree of carboxylic acid for TOMA

The  $A_v$  values for TOMA products were

$$A_v = \frac{X_{MA} \times 2 \times M_{KOH} \times 1000}{M_{TO} + X_{MA} \times (M_{MA} + 18)}$$

where  $A_v$  represents acid values,  $M_{KOH}$ ,  $M_{TO}$ , and  $M_{MA}$  represent the molar mass of KOH, TO, and MA, respectively. Thus the grafted degree of carboxylic acid ( $X_{CA}$ ) can be calculated:

$$X_{CA} = 2X_{MA} = \frac{2A_v \times M_{TO}}{2000 \times M_{KOH} - A_v \times (M_{MA} + 18)} \quad (\text{S2})$$

#### S3. Determining the grafted C=C functionality ( $N_{C=C}$ ) for TMG.

$$N_{C=C} = \frac{A_{5.61-6.17 \text{ ppm}} / 2}{A_{0.88 \text{ ppm}} / 9} = \frac{9A_{5.61-6.17 \text{ ppm}}}{2A_{0.88 \text{ ppm}}} \quad (\text{S3})$$

#### S4. Determining the cross-link density ( $\nu_c$ ).

The cross-link density of the cured materials was calculated using the following equation:

$$v_e = \frac{E'}{3RT} \quad (\text{S4})$$

where  $E'$  is the storage modulus of the cross-linked materials in the rubber state (the  $E'$  at  $T_g+60$  °C was used for the determination of  $v_e$  in this work)),  $R$  is the gas constant, and  $T$  is the absolute temperature.

#### S5. Acid values of TMG.

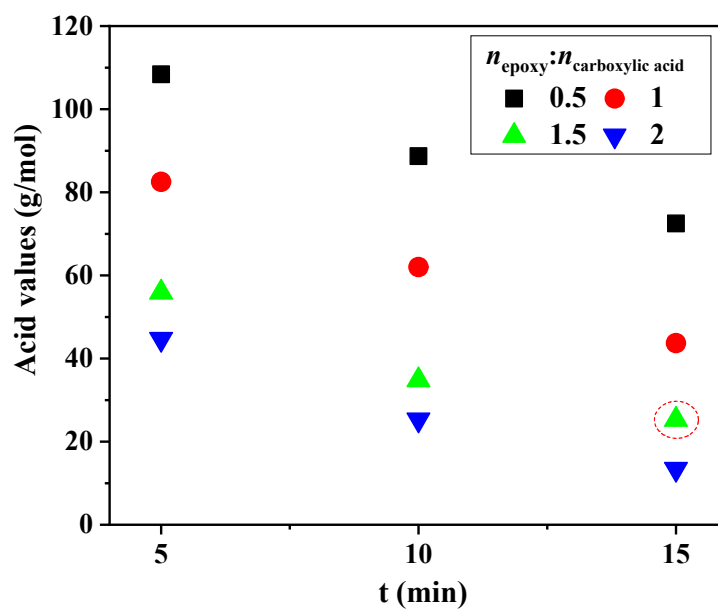

Fig. S1 Acid values of TMG.

#### S6. $^1\text{H}$ NMR spectrum of TMG.

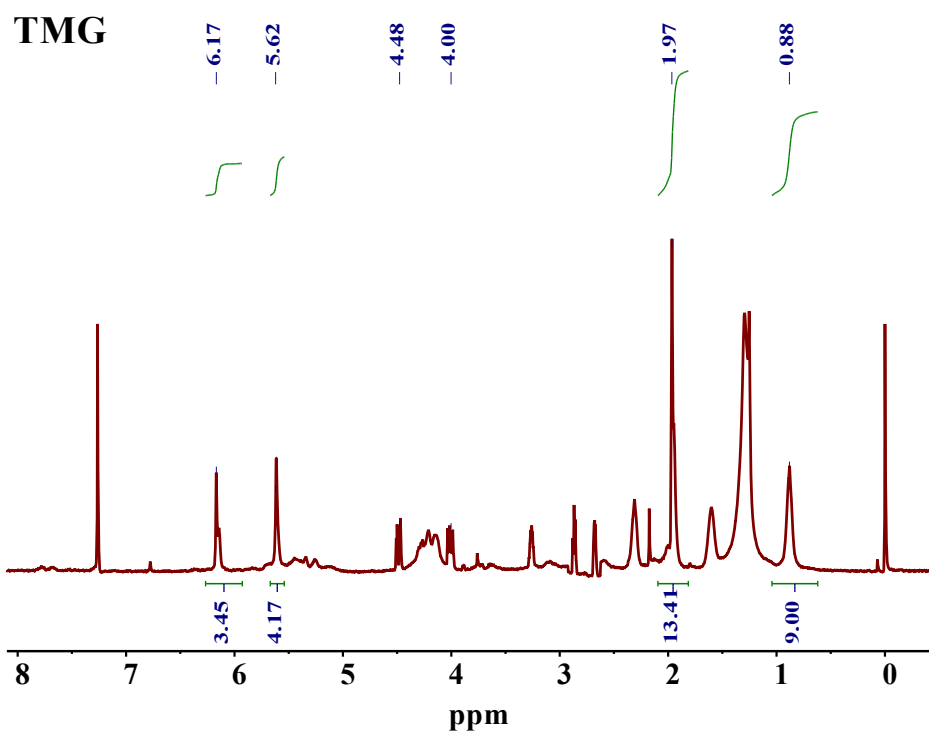

**Fig. S2**  $^1\text{H}$  NMR spectrum of TMG.

**S7. DSC curves of TMG-M1 before and after heating.**

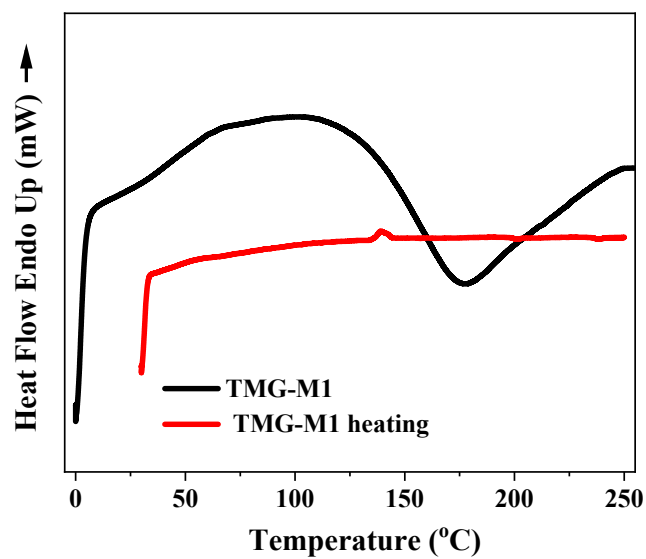

**Fig. S3** DSC curves of TMG-M1 before and after heating at  $180^{\circ}\text{C}$  for 1 h.

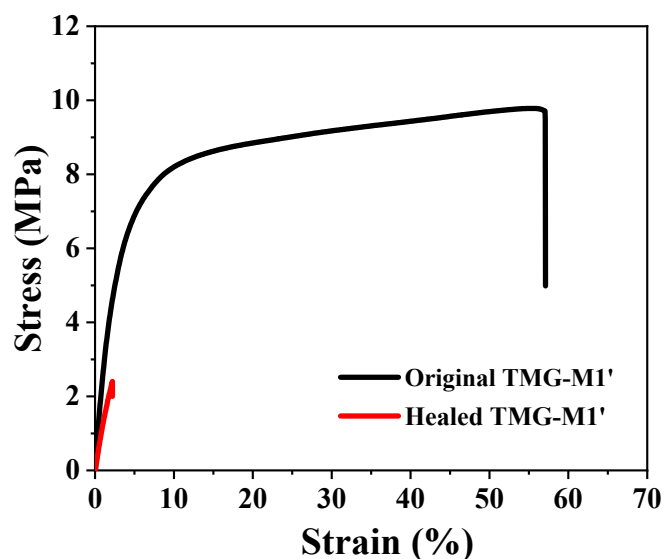

**Fig. S4** Comparison of tensile properties of the original and healed TMG-M1' samples.

#### **S8. Comparison of the effects of dynamic TER or further cross-linking on the seal-healing properties**

A sample with the same composition as TMG-M1 but without the  $\text{Zn}(\text{acac})_2$  catalyst, named as TMG-M1', was prepared and used for the self-healing tests. After welding at 180 °C for 10 min, the tensile strength and modulus of the healed TMG-M1' sample were 1.9 MPa and 52.7 MPa (**Fig. S4**), respectively, which were much lower than the healed TMG-M1 sample (12.2 MPa and 178.2 MPa). The welding efficiencies of tensile strength and modulus were only 15.6% and 25.8%, respectively, also much lower than those of TMG-M1 (171.8% and 124.0%). These results not only indicated the self-healing ability was very limited if without the effect of dynamic TERs activated by the catalyst, but also implied that the dynamic TERs played a more important role than the further cross-linking in the self-healing process.

#### **S9. Removability of the UV-cured coatings**

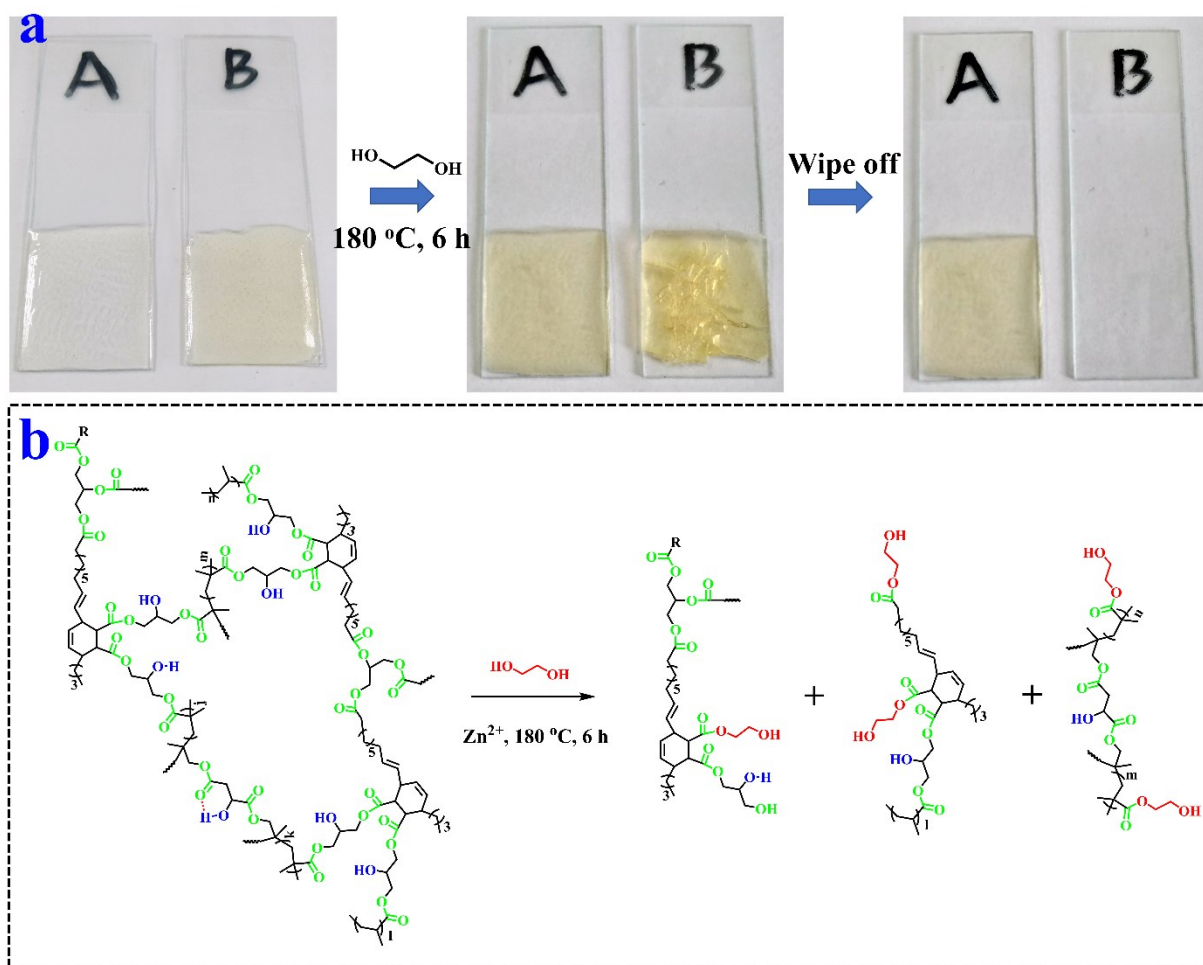

**Fig. S5** (a) Removable test of UV-cured coatings by immersing the samples (A: TMG-M1'; B: TMG-M1) into glycol solvent at 180 °C for 6 h and wiping off; (b) possible mechanism of dynamic TERs with the assistance of glycol.

**S10. Shape fixity ratios and shape recovery ratios during consecutive dual-shape memory cycles.**

**Table S1** Shape fixity ratios ( $S_f$ ) and shape recovery ratios ( $S_r$ ) during consecutive dual-shape memory cycles.

| Samples | $S_f$ (%) | $S_r$ (%) |
|---------|-----------|-----------|
| Cycle 1 | 98.2      | 92.0      |

|         |      |      |
|---------|------|------|
| Cycle 2 | 98.0 | 87.5 |
| Cycle 3 | 98.0 | 85.4 |
| Cycle 4 | 97.5 | 84.6 |

---
